# Supplementary material for: Mineralized collagen scaffolds induce hMSC osteogenesis and matrix remodeling
Source: Royal Society of Chemistry journal article supplement (doi:10.1039/c4bm00397g), 2015-01-01
Supplement: c4bm00397g1.pdf [file c4bm00397g1.pdf]

## Supporting Information

### Mineralized collagen scaffolds induce hMSC osteogenesis and matrix remodeling

Daniel W. Weisgerber, Steven R. Caliri, Brendan A.C. Harley

| Name          | Forward                   | Reverse                           | Source |
|---------------|---------------------------|-----------------------------------|--------|
| <i>COL1A1</i> | CAG CCG CTT CAC CTA CAG C | TTT TGT ATT CAA TCA CTG TCT TGC C | 62     |
| <i>OPN</i>    | GCG AGG AGT TGA ATG GTG   | CTT GTG GCT GTG GGT TTC           | 62     |
| <i>RUNX2</i>  | GGTTAATCTCCGCAGGTCCTACT   | CACTGTGCTGAAGAGGCTGTT             | 63     |
| <i>BSP</i>    | TGCCTTGAGCCTGCTTCC        | GCAAAATTAAGCAGTCTTCATTTTG         | 64     |
| <i>GAPDH</i>  | CCATGAGAAGTATGACAACAGCC   | CCTTCCACGATACCAAAGTTG             | 65     |

**Supplementary Table 1.** Primer sequences used for PCR.

| Sample           | Day 14       |            | Day 28       |            | Day 56      |            |
|------------------|--------------|------------|--------------|------------|-------------|------------|
|                  | Moduli, kPa  | Est. Dens. | Moduli, kPa  | Est. Dens. | Moduli, kPa | Est. Dens. |
| CG (unseeded)    | 1.83 ± 0.48  | ---        | 1.71 ± 0.43  | 1.00       | 1.24 ± 0.21 | 1.00       |
| CG Growth        | 1.57 ± 0.43  | 0.93       | 1.11 ± 0.30* | 0.81       | 1.51 ± 0.13 | 1.10       |
| CGCaP (unseeded) | 23.00 ± 0.59 | ---        | 19.8 ± 1.4   | 1.00       | 23.4 ± 3.3  | 1.00       |
| CGCaP Growth     | 34.7 ± 4.4   | 1.23       | 37.7 ± 3.3   | 1.38       | 58.7 ± 3.7  | 1.58       |
| CGCaP BMP2       | 33.7 ± 2.7   | 1.21       | 45.0 ± 7.7   | 1.51       | 62.7 ± 7.3  | 1.63       |
| CGCaP Osteo      | 44.1 ± 5.6   | 1.39       | 48 ± 11      | 1.56       | 76.9 ± 9.2  | 1.81       |

**Supplementary Table 2.** Elastic moduli of hMSC-seeded non-mineralized and mineralized collagen scaffolds as a function of culture time and media supplementation (n=3, \*: n=2). The estimated densification (Est. Dens.;  $\rho_{cells} / \rho_{acellular}$ ) of the scaffold was calculated via established cellular solids theory methods from the difference in modulus of the hMSC-seeded vs. unseeded scaffold at each timepoint.

|              | Day 14   | Day 28   | Day 56   |
|--------------|----------|----------|----------|
| CGCaP Growth | 130 ± 13 | 136 ± 10 | 143 ± 10 |
| CGCaP BMP2   | 131 ± 16 | 134 ± 10 | 142 ± 10 |
| CGCaP Osteo  | 133 ± 5  | 132 ± 14 | 137 ± 10 |

**Supplementary Table 3.** Mean pixel intensity (A.U.) of Alizarin Red stained histology samples of hMSC-seeded mineralized collagen scaffolds.

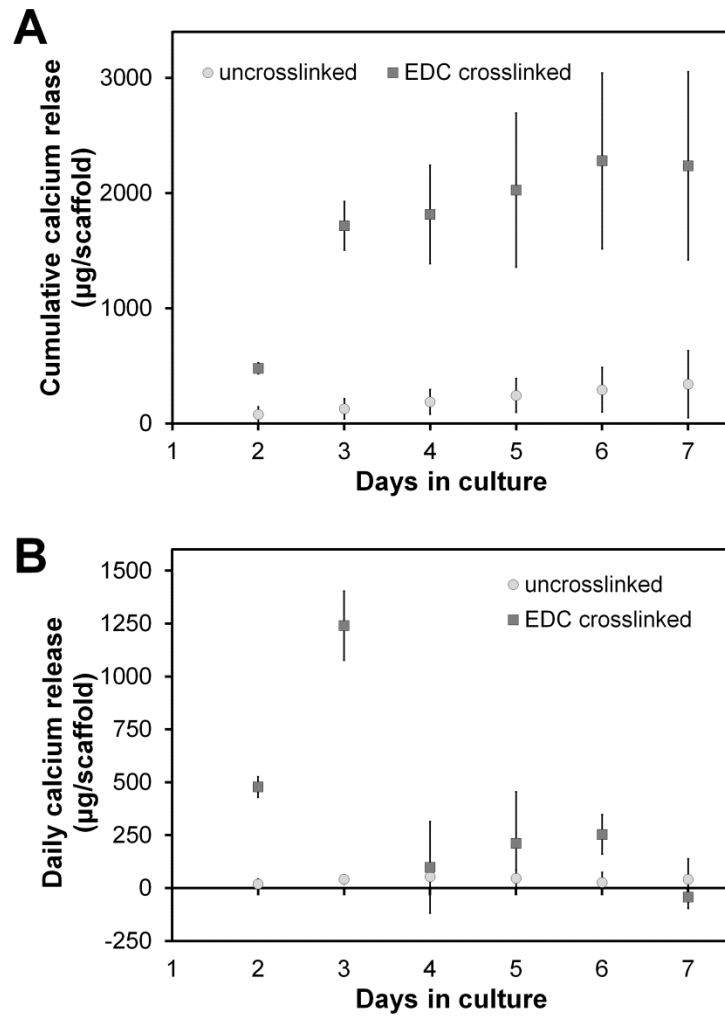

**Supplementary Figure 1.** (A) Cumulative versus (B) daily release of calcium ions from non-crosslinked and EDC-crosslinked CGCaP scaffolds.

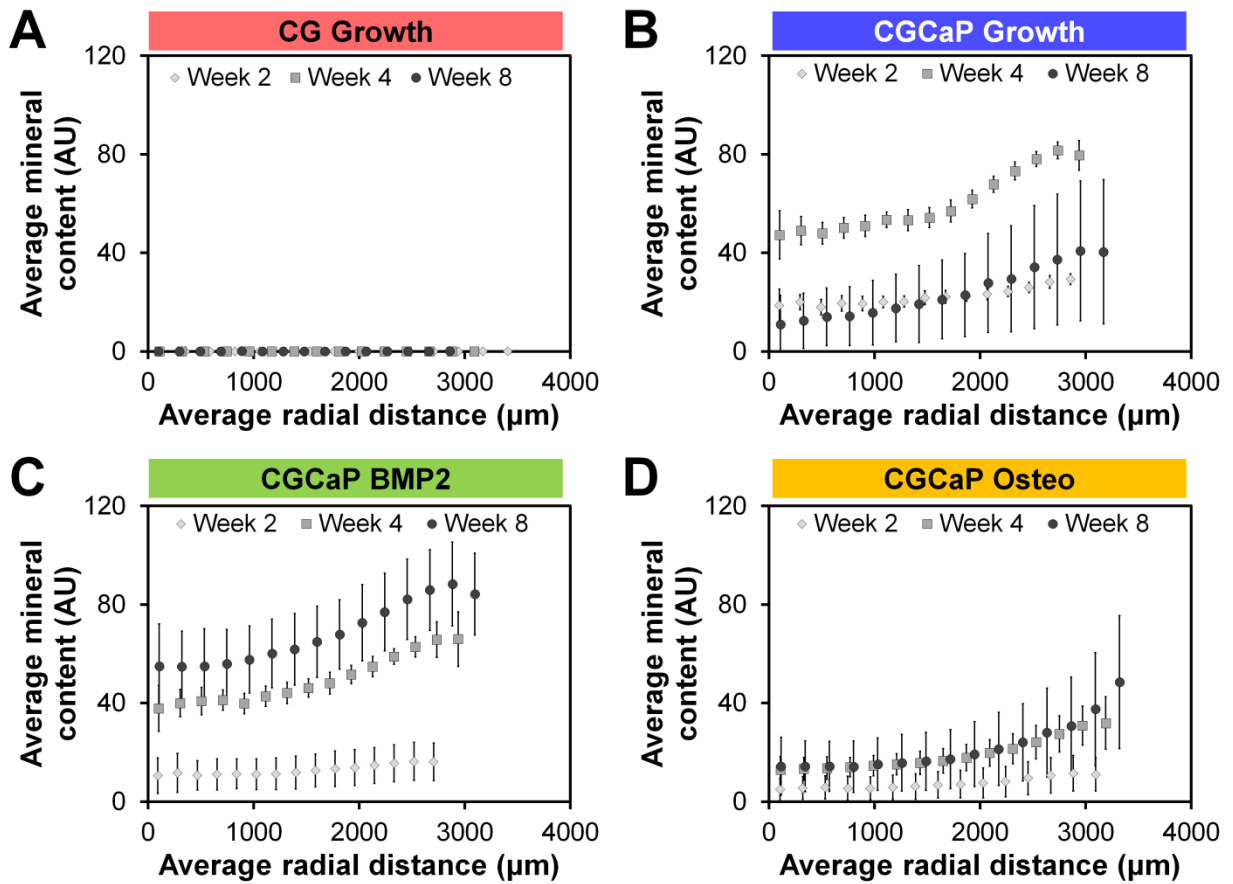

**Supplementary Figure 2.** Radial distribution pattern of mineral content for hMSC-seeded collagen scaffolds with culture time (2, 4, 8 weeks) as determined via micro-CT for (A) non-mineralized scaffold in growth media; or mineralized scaffold in (B) growth media, (C) BMP2 supplemented media, or (D) osteogenic media.
